# Supplementary material
Source: Springer Nature journal article supplement (https://www.springermedizin.de/resource/supplementary/13058_2011_2966_MOESM5_ESM.pdf/9702914)
Supplement: MOESM5 [file 9702914]

**A**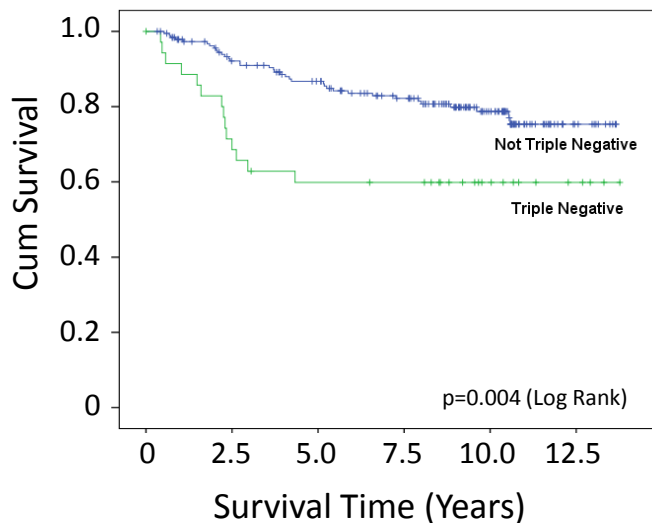

|                     | In Follow up after: |         |          | Total |
|---------------------|---------------------|---------|----------|-------|
|                     | 1 Year              | 5 Years | 10 Years |       |
| Not Triple Negative | 176                 | 140     | 64       | 189   |
| Triple Negative     | 32                  | 20      | 10       | 36    |

**B**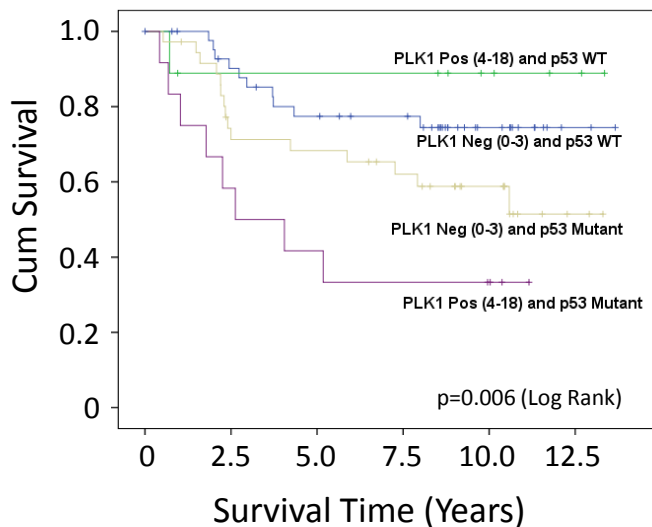

|                      | In Follow up after: |         |          | Total |
|----------------------|---------------------|---------|----------|-------|
|                      | 1 Year              | 5 Years | 10 Years |       |
| PLK1 Neg, p53 WT     | 41                  | 30      | 12       | 44    |
| PLK1 Pos, p53 WT     | 7                   | 7       | 4        | 9     |
| PLK1 Neg, p53 Mutant | 35                  | 23      | 12       | 36    |
| PLK1 Pos, p53 Mutant | 10                  | 5       | 4        | 12    |
